# Supplementary material for: Linking hIAPP misfolding and aggregation with type 2 diabetes mellitus: a structural perspective
Source: PubMed Central journal article supplement (PMC9118370; doi:10.1042/bsr20211297), 2022-05-18
Supplement: BSR-2021-1297C_supp.pdf [file BSR-2021-1297C_supp.pdf]

**Supplementary File S1**

**Table S.1:** Summary of mutational studies using full-length synthetic hIAPP created with point mutations and their effects on amyloid formation, arranged with the most recent studies first.

| <b>Mutation</b><br><b>Full length IAPP 1-37</b> | <b>Results</b>                      | <b>Citation</b> |
|-------------------------------------------------|-------------------------------------|-----------------|
| A25T                                            | Faster amyloid formation            | (1)             |
| K1I                                             | Slightly slower amyloid formation   | (1)             |
| H18R                                            | Slower amyloid formation            | (1)             |
| S28P S29P                                       | Abolishes amyloid formation         | (2)             |
| A25P S29P                                       | Slower amyloid formation            | (2)             |
| A25P S28P                                       | Abolishes amyloid formation         | (2)             |
| S29P                                            | Slower amyloid formation            | (2)             |
| S28P                                            | Abolishes amyloid formation         | (2)             |
| A25P                                            | Slower amyloid formation            | (2)             |
| Des L1 2-37 hIAPP                               | No effect reported                  | (3)             |
| L1CML (carboxymethyl)-L-lysine                  | Faster amyloid formation            | (4)             |
| N21G                                            | Slower amyloid formation            | (5)             |
| N21n (D-aminoacid)                              | Faster amyloid formation            | (5)             |
| N21Aib (aminoisobutyric acid)                   | Slower amyloid formation            | (5)             |
| N21P                                            | Faster amyloid formation            | (5)             |
| N21Dab (diaminobutyric acid)                    | Abolishes amyloid formation         | (5)             |
| N21D                                            | Abolishes amyloid formation         | (5)             |
| N21L                                            | Abolishes amyloid formation         | (5)             |
| N21F                                            | Abolishes amyloid formation         | (5)             |
| N21A                                            | Faster amyloid formation            | (5)             |
| N31K                                            | Slower amyloid formation            | (6)             |
| S29P                                            | Slower amyloid formation            | (6)             |
| N22K                                            | Slower amyloid formation            | (6)             |
| H18P                                            | Slower amyloid formation            | (6)             |
| H18RS20G                                        | Slower amyloid formation            | (7)             |
| S29P                                            | Slower amyloid formation            | (7)             |
| S20G                                            | Faster amyloid formation            | (7)             |
| H18R                                            | Slower amyloid formation            | (7)             |
| H18E                                            | Slower amyloid formation            | (8)             |
| H18A                                            | Slower amyloid formation            | (8)             |
| H18K                                            | Slower amyloid formation            | (8)             |
| H18R                                            | Slower amyloid formation            | (8)             |
| N35isoD                                         | No effect reported                  | (9)             |
| N35D                                            | No effect reported                  | (9)             |
| N31isoD                                         | Slower amyloid formation            | (9)             |
| N31D                                            | Slower amyloid formation            | (9)             |
| N22isoD                                         | slight slower amyloid formation     | (9)             |
| N22D                                            | Slightly slower amyloid formation   | (9)             |
| N21D                                            | Abolishes amyloid formation         | (9)             |
| N21isoD                                         | Abolishes amyloid formation         | (9)             |
| N14isoD                                         | No effect reported                  | (9)             |
| N14D                                            | Faster amyloid formation            | (9)             |
| Unamidated C terminal hIAPP                     | Slower amyloid formation            | (10)            |
| H18Q unamidated C terminal hIAPP                | Faster amyloid formation            | (10)            |
| H18Q                                            | Moderately faster amyloid formation | (10)            |
| H18L                                            | Faster amyloid formation            | (10)            |
| F15TLe (Tert-leucine)                           | Slower amyloid formation            | (11)            |
| F15I                                            | Slower amyloid formation            | (11)            |
| F15NLe (Norleucine)                             | Slower amyloid formation            | (11)            |

|                              |                             |         |
|------------------------------|-----------------------------|---------|
| F15L F23L Y37L (3XL)         | Slower amyloid formation    | (11)    |
| F23L Y37L                    | Slower amyloid formation    | (11)    |
| F15L Y37L                    | Slower amyloid formation    | (11)    |
| F15L F23L                    | Slower amyloid formation    | (11)    |
| Y37L                         | Slower amyloid formation    | (11)    |
| F23L                         | Slower amyloid formation    | (11)    |
| F15L                         | Faster amyloid formation    | (11)    |
| S20K                         | Slower amyloid formation    | (12)    |
| S20G                         | Faster amyloid formation    | (12)    |
| S28G                         | Abolishes amyloid formation | (13)    |
| I26D                         | Abolishes amyloid formation | (13)    |
| L16Q                         | Abolishes amyloid formation | (13)    |
| A13E                         | Abolishes amyloid formation | (13)    |
| H18R                         | Slower amyloid formation    | (14)    |
| G24P                         | Abolishes amyloid formation | (15,16) |
| I26P                         | Abolishes amyloid formation | (15,16) |
| F15L/F23L/Y37 3XL            | Slower amyloid formation    | (17)    |
| A25P/S28P/S29P (Pramlintide) | Abolishes amyloid formation | (18)    |

**Table S.2:** Summary of all mutational studies using synthetic hIAPP fragment 8-37 and their effect on amyloid formation. The table is ordered in the reverse chronological order of references showing the most recent studies first.

| <b>Mutation</b><br><b>Fragment of human IAPP 8-37</b> | <b>Results</b>              | <b>Citation</b> |
|-------------------------------------------------------|-----------------------------|-----------------|
| V17K                                                  | No effect reported          | (19)            |
| V17A                                                  | Faster amyloid formation    | (19)            |
| F15D                                                  | Faster amyloid formation    | (19)            |
| F15K                                                  | Slower amyloid formation    | (19)            |
| F15S                                                  | Faster amyloid formation    | (19)            |
| F15A                                                  | Faster amyloid formation    | (19)            |
| H18R/F23L/A25P/I26P                                   | Abolished amyloid formation | (20)            |
| H18R/S28P/S29P                                        | Abolished amyloid formation | (20)            |
| H18R/F23L                                             | Slower amyloid formation    | (20)            |
| F23L                                                  | Slower amyloid formation    | (20)            |
| H18R                                                  | No effect reported          | (20)            |
| T36C                                                  | No change reported          | (21)            |
| T30C                                                  | Slower amyloid formation    | (21)            |
| A25C                                                  | Slower amyloid formation    | (21)            |
| V17C                                                  | Faster amyloid formation    | (21)            |
| A13C                                                  | Slower amyloid formation    | (21)            |
| N14L/L16N                                             | Abolished amyloid formation | (21)            |
| L12N/N14L                                             | Abolished amyloid formation | (21)            |
| N35L                                                  | Slower amyloid formation    | (21)            |
| N31L                                                  | Slower amyloid formation    | (21)            |
| N22L                                                  | No effect reported          | (21)            |
| N21S                                                  | Abolished amyloid formation | (21)            |
| N21L                                                  | Abolished amyloid formation | (21)            |
| N14S                                                  | Abolished amyloid formation | (21)            |
| N14A                                                  | Abolished amyloid formation | (21)            |
| N14L                                                  | Abolished amyloid formation | (21)            |
| V17P/S19P/T30P (3XP)                                  | Abolishes amyloid formation | (22)            |

## References

1. Ridgway Z, Lee K-H, Zhyvoloup A, Wong A, Eldrid C, Hannaberry E, et al. Analysis of Baboon IAPP Provides Insight into Amyloidogenicity and Cytotoxicity of Human IAPP. *Biophysical Journal*. 2020 Mar;118(5):1142–51.
2. Ridgway Z, Eldrid C, Zhyvoloup A, Ben-Younis A, Noh D, Thalassinos K, et al. Analysis of Proline Substitutions Reveals the Plasticity and Sequence Sensitivity of Human IAPP Amyloidogenicity and Toxicity. *Biochemistry*. 2020 Feb 18;59(6):742–54.
3. Lee K-H, Zhyvoloup A, Raleigh D. Amyloidogenicity and cytotoxicity of des-Lys-1 human amylin provides insight into amylin self-assembly and highlights the difficulties of defining amyloidogenicity. Daggett V, editor. *Protein Engineering, Design and Selection*. 2019 Dec 13;32(2):87–93.
4. Hsu Y-H, Chen Y-W, Wu M-H, Tu L-H. Protein Glycation by Glyoxal Promotes Amyloid Formation by Islet Amyloid Polypeptide. *Biophysical Journal*. 2019 Jun;116(12):2304–13.
5. Godin E, Nguyen PT, Zottig X, Bourgault S. Identification of a hinge residue controlling islet amyloid polypeptide self-assembly and cytotoxicity. *J Biol Chem*. 2019 May 24;294(21):8452–63.
6. Akter R, Bower RL, Abedini A, Schmidt AM, Hay DL, Raleigh DP. Amyloidogenicity, Cytotoxicity, and Receptor Activity of Bovine Amylin: Implications for Xenobiotic Transplantation and the Design of Nontoxic Amylin Variants. *ACS Chem Biol*. 2018 Sep 21;13(9):2747–57.
7. Akter R, Abedini A, Ridgway Z, Zhang X, Kleinberg J, Schmidt AM, et al. Evolutionary Adaptation and Amyloid Formation: Does the Reduced Amyloidogenicity and Cytotoxicity of Ursine Amylin Contribute to the Metabolic Adaption of Bears and Polar Bears? *Isr J Chem*. 2017 Jul;57(7–8):750–61.
8. Khemtemourian L, Guillemain G, Foufelle F, Killian JA. Residue specific effects of human islet polypeptide amyloid on self-assembly and on cell toxicity. *Biochimie*. 2017 Nov;142:22–30.
9. Nguyen PT, Zottig X, Sebastiao M, Bourgault S. Role of Site-Specific Asparagine Deamidation in Islet Amyloid Polypeptide Amyloidogenesis: Key Contributions of Residues 14 and 21. *Biochemistry*. 2017 Jul 25;56(29):3808–17.
10. Tu L-H, Serrano AL, Zanni MT, Raleigh DP. Mutational Analysis of Preamyloid Intermediates: The Role of His-Tyr Interactions in Islet Amyloid Formation. *Biophysical Journal*. 2014 Apr;106(7):1520–7.
11. Tu L-H, Raleigh DP. The role of aromatic interactions in amyloid formation by islet amyloid polypeptide. *Biochemistry*. 2013 Jan 15;52(2):333–42.
12. Cao P, Tu L-H, Abedini A, Levsh O, Akter R, Patsalo V, et al. Sensitivity of Amyloid Formation by Human Islet Amyloid Polypeptide to Mutations at Residue-20. *J Mol Biol*. 2012 Aug 10;421(2–3):282–95.
13. Fox A, Snollaerts T, Errecart Casanova C, Calciano A, Nogaj LA, Moffet DA. Selection for Nonamyloidogenic Mutants of Islet Amyloid Polypeptide (IAPP) Identifies an Extended Region for Amyloidogenicity. *Biochemistry*. 2010 Sep 14;49(36):7783–9.

14. Wiltzius JJW, Landau M, Nelson R, Sawaya MR, Apostol MI, Goldschmidt L, et al. Molecular mechanisms for protein-encoded inheritance. *Nat Struct Mol Biol.* 2009 Sep;16(9):973–8.
15. Abedini A, Meng F, Raleigh DP. A Single-Point Mutation Converts the Highly Amyloidogenic Human Islet Amyloid Polypeptide into a Potent Fibrillization Inhibitor. *J Am Chem Soc.* 2007 Sep 1;129(37):11300–1.
16. Meng F, Raleigh DP, Abedini A. The Combination of Kinetically Selected Inhibitors in Trans Leads to the Highly Effective Inhibition of Amyloid Formation. *J Am Chem Soc.* 2010 Oct 20;132(41):14340–2.
17. Marek P, Abedini A, Song B, Kanungo M, Johnson ME, Gupta R, et al. Aromatic Interactions Are Not Required for Amyloid Fibril Formation by Islet Amyloid Polypeptide but Do Influence the Rate of Fibril Formation and Fibril Morphology. *Biochemistry.* 2007 Mar 1;46(11):3255–61.
18. Ratner RE, Dickey R, Fineman M, Maggs DG, Shen L, Strobel SA, et al. Amylin replacement with pramlintide as an adjunct to insulin therapy improves long-term glycaemic and weight control in Type 1 diabetes mellitus: a 1-year, randomized controlled trial. *Diabet Med.* 2004 Nov;21(11):1204–12.
19. Wiltzius JJW, Sievers SA, Sawaya MR, Eisenberg D. Atomic structures of IAPP (amylin) fusions suggest a mechanism for fibrillation and the role of insulin in the process: Mechanism of IAPP (Amylin) Fibrillation. *Protein Science.* 2009 Jul;18(7):1521–30.
20. Wiltzius JJW, Sievers SA, Sawaya MR, Cascio D, Popov D, Riekkel C, et al. Atomic structure of the cross- $\beta$  spine of islet amyloid polypeptide (amylin). *Protein Science.* 2008;17(9):1467–74.
21. Koo BW, Hebda JA, Miranker AD. Amide inequivalence in the fibrillar assembly of islet amyloid polypeptide. *Protein Engineering, Design and Selection.* 2008 Mar 1;21(3):147–54.
22. Abedini A, Raleigh DP. Destabilization of human IAPP amyloid fibrils by proline mutations outside of the putative amyloidogenic domain: is there a critical amyloidogenic domain in human IAPP? *J Mol Biol.* 2006 Jan 13;355(2):274–81.
